# Supplementary material for: A new binuclear ruthenium complex with an annelated C7 bridge via an unprecedented [2 + 2] coupling reaction
Source: Royal Society of Chemistry journal article supplement (doi:10.1039/b103301h), 2001-01-01
Supplement: b103301h.doc [file b103301h.doc]

### **Supplementary materials**

All experiments were carried out under Argon. Solvent were freshly distilled. The NMR data of the phenyl groups are omitted for clarity.

**2**: A 1.6 M commercial solution of MeLi (1.875 mL, 3.0 mmol) in diethyl ether was slowly added to a cooled stirred solution (-78°C) of Me3Si-CC-CC-SiMe3 (660 mg, 3.4 mmol) in 40 mL of THF. At the end of the addition, the mixture was stirred for 1 h at -78°C and then 3 h at room temperature. This solution was transferred to a suspension of *cis*-RuCl(dppe)2 (**1**) (1.936 g, 2.0 mmol) in 60 mL of THF. The mixture was stirred for 18 h at room temperature. After filtration with a canula, the solvent was removed under vacuum and the crude product washed with pentane, dried and purified by neutral alumina column with diethyl ether as eluent. 1.26 g of complex **2** (63%) was obtained. Anal. Calcd. for C59H57ClP4SiRu : C, 67.20 ; H, 5.45. Found : C, 67.08 ; H, 5.50. IR (cm-1, KBr) : 2175 (m, CC), 2103 (s, CC), 1999 (m, CC). 31P{1H} NMR (CDCl3, 121.47 MHz, 297 K,  ppm) : 49.09 (s, PPh2). 1H NMR (CDCl3, 300.13 MHz, 297 K,  ppm) : 7.46-6.97 (40H, Ph), 2.65 (quint., 8H, PCH2CH2P, 2JPH + 4JPH = 7Hz), 0.19 (s., 9H, SiMe3). 13C{1H}, NMR(CDCl3, 75.47 MHz, 297 K, ppm) : 135.57-127.12 (Ph, Ru-CC masked by the phenyl signals), 96.27 (s, Ru-CC-), 95.53 (s, Ru-CC-CC-), 66.83 (s, Ru-CC-CC-), 30.67 (quint, PCH2CH2P, 1JPC + 3JPC = 23 Hz), 1.28 (s, Si(CH2)3). HR-MS FAB+ (m/z): 1054.1916 ([M+H]+, calcd: 1054.1925). UV/vis (CH2Cl2): max () 278 (27300) nm (mol-1.L.cm-1). Cyclic voltammetry (CH2Cl2, nBu4NPF6 0.1M, 200 mV.s-1, V *vs*. ferrocene) : E° = 0.125 V.

**3**: In a Schlenk tube containing 527 mg of **2** (0.5 mmol.), and 83 mg of ferrocenium salt [FeCp2]PF6 (0.25 mmol.), 50 mL of THF were added. The solution was stirred during 8 h at room temperature. After filtration, the solution was evaporated and then the residue washed with diethyl ether. After several crystallisation in a mixture dichloromethane/pentane, 475 mg of dark purple crystals of **3** were obtained (45%). IR (cm-1, KBr) : 1909 (s., C=C=C), 838 (s., PF). 31P{1H} NMR (CDCl3, 121.47 MHz, 297 K,  ppm) : 44.81 (s., PPh2), -143.95 (sept., JPF = 715 Hz). 1H NMR (CDCl3, 300.13 MHz, 297 K,  ppm) : 7.47 to 7.02 (80H, Ph), 5.07(s, 1H), 2.78 (m, 4H, PCH2CH2P), 2.65 (m, 4H, PCH2CH2P), 2.06 (s, 2H). 13C{1H} NMR (CDCl3, 75.47 MHz, 297,  ppm) : 284.4 (quint., Ru-C, *2Jp*c = 14 Hz), 166.4 (s, C2), 147.38 (s, C3), 139.88 (s, (CH)C4), 49.02 (s, (CH2)C4’), 30.32 (quint., PCH2CH2P, *1Jpc + 3Jpc* = 23 Hz). HR-MS FAB+ (m/z): 1965.3112 ([M]+, calcd: 1965.3111). UV/vis (CH2Cl2): max () 270 (73600), 633 (141000) nm (mol-1.L.cm-1). Cyclic voltammetry (CH2Cl2, nBu4NPF6 0.1M, 200 mV.s-1, V *vs* SCE) : Eox1° = 0.42 V, Epaox2 = 0.91 V, Ered° = -1.48 V.
